# Supplementary material
Source: Springer Nature journal article supplement (https://www.springermedizin.de/resource/supplementary/12884_2013_1002_MOESM6_ESM.pdf/9458746)

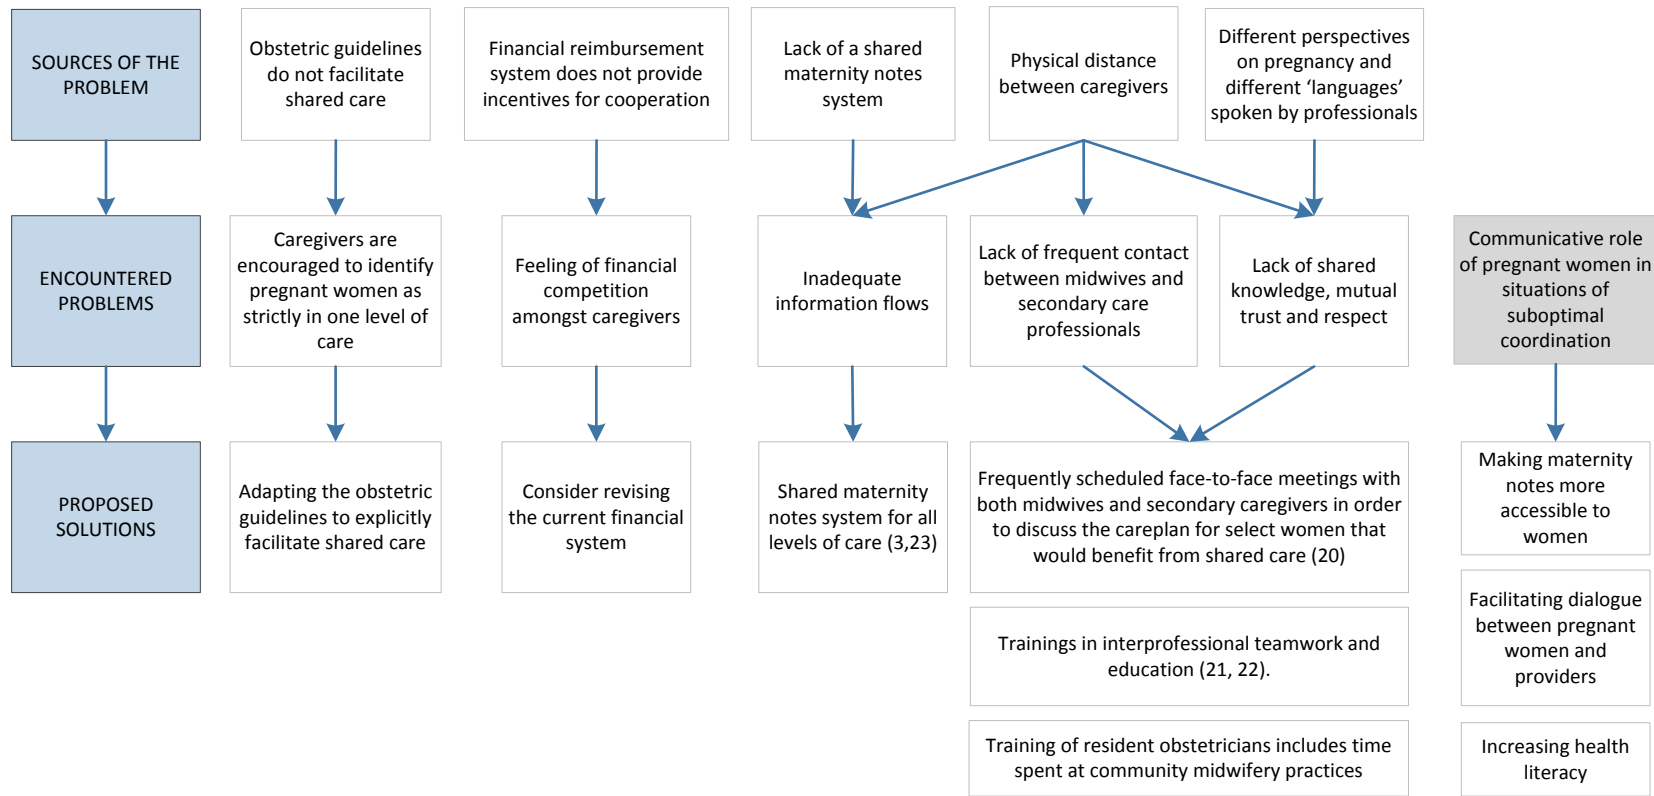

Supplement: MOESM6 [file 9458746]
